# REFERENCES

1. Bull BS, Korpman RA, Huse WM, Briggs BD: Heparin therapy during extracorporeal circulation: I. Problems inherent in existing heparin protocols. *J Thorac Cardiovasc Surg* 69:674-684, 1975
2. Bull BS, Huse WM, Brauer FS, Korpman RA: Heparin therapy during extracorporeal circulation: II. The use of a dose-response curve to individualize heparin and protamine dosage. *J Thorac Cardiovasc Surg* 69:685-689, 1975
3. Hattersley PG: Activated coagulation time of whole blood. *JAMA* 196:430-436, 1966
4. Effenev DJ, Goldstone J, Chin D, Krupski WC, Ellis RJ: Intraoperative anticoagulation in cardiovascular surgery. *Surgery* 90:1068-1074, 1981
5. Jaques LB, Ricker AG: The relationship between heparin dosage and clotting time. *Blood* 3:1197-1212, 1948
6. deTakats G: Heparin tolerance: A test of the clotting mechanism. *Surg Gynecol Obstet* 77:31-39, 1943
7. Culliford AT, Gitel SN, Starr N, Thomas ST, Baumann FG, Wessler S, Spencer FC: Lack of correlation between activated clotting time and plasma heparin during cardiopulmonary bypass. *Ann Surg* 193:105-111, 1981
8. Cohen EJ, Camerlengo LJ, Dearing JP: Activated clotting times and cardiopulmonary bypass I: The effect of hemodilution and hypothermia upon activated clotting time. *J Extracorp Tech* 12:139-141, 1980
9. Esposito RA, Culliford AT, Colvin SB, Thomas SJ, Lackner H, Spencer FC: The role of the activated clotting time in heparin administration and neutralization for cardiopulmonary bypass. *J Thorac Cardiovasc Surg* 85:174-185, 1983
10. Schriever HG, Epstein SE, Mintz MD: Statistical correlation and heparin sensitivity of activated partial thromboplastin time, whole blood coagulation time, and an automated coagulation time. *Am J Clin Pathol* 60:323-329, 1973
11. Stenbjerg S, Berg E, Albrechtsen OK: Heparin levels and activated clotting time (ACT) during open heart surgery. *Scand J Haematol* 26:281-284, 1981
12. Congdon JE, Kardinal CG, Wallin JD: Monitoring heparin therapy in hemodialysis: A report on the activated whole blood coagulation time tests. *JAMA* 226:1529-1533, 1973
13. Estes JW: Clinical pharmacokinetics of heparin. *Clin Pharmacokinet* 5:204-220, 1980
14. Cipolle RJ, Seifert RD, Neilan BA, Zaske DE, Haus E: Heparin kinetics: Variables related to disposition and dosage. *Clin Pharmacol Ther* 29:387-393, 1981
15. Hiebert LM, Jaques LB: The observation of heparin on endothelium after injection. *Thromb Res* 8:195-204, 1976
16. Mahadoo J, Hiebert L, Jaques LB: Vascular sequestration of heparin. *Thromb Res* 12:79-90, 1977
17. Glimelius B, Busch C, Hook M: Binding of heparin on the surface of cultured human endothelial cells. *Thromb Res* 12:773-782, 1978
18. Barzu T, Molho P, Tobelem G, Petitou M, Caen J: Binding and endocytosis of heparin by human endothelial cells in culture. *Biochim Biophys Acta* 845:196-203, 1985
19. deSwart CAM, Nijmeyer B, Roelofs JMM, Sixma JJ: Kinetics of intravenously administered heparin in normal humans. *Blood* 60:1251-1258, 1982
20. Decousus M, Gremillet E, Decousus H, Champaviller A, Houzard C, Perpoint B, Jaubert J: Nycthemeral variations of <sup>99</sup>Tc-labelled heparin pharmacokinetic parameters. *Nucl Med Commun* 6:633-640, 1985
21. Hattersley PG: Progress report: The activated coagulation time of whole blood (ACT). *Am J Clin Pathol* 66:899-904, 1976
22. Estes JW: The fate of heparin in the body. *Curr Therapeut Res* 18:45-57, 1975
23. Wright JS, Osborn JJ, Perkins HA, Gerbode F: Heparin levels during and after hypothermic perfusion. *J Cardiovasc Surg* 5:244-250, 1964
24. Young JA, Kisker CT, Doty DB: Adequate anticoagulation during cardiopulmonary bypass determined by activated clotting time and the appearance of fibrin monomer. *Ann Thorac Surg* 26:231-240, 1978

## Sufentanil Analgesia Following Cesarean Section: Epidural *Versus* Intravenous Administration

S. E. COHEN, M.B., CH.B., F.F.A.R.C.S.,\* S. TAN, M.D.,† P. F. WHITE, M.D., PH.D.‡

\* Professor of Anesthesia (Clinical); Director, Obstetric Anesthesia.

† Fellow in Obstetric Anesthesia.

‡ Associate Professor of Anesthesia; Chief, Outpatient Anesthesia Service.

Received from the Department of Anesthesia, Stanford University School of Medicine, Stanford, California. Accepted for publication August 3, 1987.

Address reprint requests to Dr. Cohen: Department of Anesthesia, Stanford University School of Medicine, Stanford, California 94305-5117.

Key words: Analgesics, narcotic: sufentanil. Anesthesia: obstetrics. Anesthetic techniques: epidural; patient-controlled analgesia.

Administration of epidural opioids for the relief of postoperative pain has become a common practice in the management of cesarean section patients.<sup>1</sup> Although morphine and other long-acting agents have been used commonly for this purpose, the risk of delayed respiratory depression from cephalad spread of the opiate in the cerebrospinal fluid remains a disadvantage for patients who are not normally intensively monitored.<sup>1-3</sup> Another disadvantage of epidural morphine relates to its low lipid solubility and slow onset of action. Theoretically, these drawbacks should be less

problematic with sufentanil, a highly lipid soluble and more rapid-acting opioid analgesic. After epidural administration, sufentanil (like other lipophilic agents) is more likely to penetrate neural tissue and either remain localized there, or be cleared by absorption into the circulation.<sup>1</sup> The aims of this study were: 1) to determine serum levels of sufentanil following its administration intravenously or epidurally to parturients following cesarean section; and 2) to evaluate clinical efficacy and side effects of epidural and intravenous sufentanil utilizing a randomized double-blind study design.

### MATERIALS AND METHODS

The protocol was approved by the Medical Committee for the Protection of Human Subjects in Research, and informed consent was obtained from all participants. The study was conducted in two separate phases. Phase I was designed to determine serum sufentanil levels in a small number of patients following either epidural or intravenous (iv) administration of sufentanil for post-cesarean analgesia. Phase II was designed to evaluate the clinical efficacy and side effects of intravenous and epidural sufentanil administered in a randomized double-blind manner. In both phases of the study, patients were healthy parturients undergoing elective cesarean section at term. Epidural anesthesia was performed at the L<sub>2-3</sub> or L<sub>3-4</sub> level, with the patient in the sitting position. An epidural catheter was introduced 2–3 cm into the epidural space. Surgical anesthesia to the T<sub>4</sub> level was obtained with 2% lidocaine with 1:200,000 epinephrine, supplemented with 3% 2-chloroprocaine if necessary during the operation. Patients received no narcotic analgesics prior to administration of the study drug.

*Phase I.* Ten minutes following delivery of the infant, patients received either: iv sufentanil, 30 µg (n = 6); epidural sufentanil, 30 µg (n = 6); epidural sufentanil, 50 µg (n = 6); or epidural sufentanil, 50 µg, with epinephrine 1:200,000 (n = 5). The intravenous injection was administered over a 3–5 min period. Venous blood was obtained from a large antecubital vein *via* a 16-gauge intravenous catheter connected to two three-way stopcocks; 5–10 ml of blood were aspirated and discarded immediately prior to obtaining each blood sample (which was stored in a red-top vacutainer tube). Venous blood samples were obtained at 5–15-min intervals for the first 90 min, and subsequently every 30–60 min for up to 4 h after injection. The blood specimens were centrifuged in a cold room, and the serum obtained was immediately frozen at –20° C. Serum sufentanil levels were measured using a standard radioimmunoassay technique,<sup>4</sup> with a lower limit of sensitivity of 0.1 ng/ml. The variability of the assay was

±12%. The duration of analgesia was reported as the time from sufentanil injection until the patient first requested additional analgesic medication. Data also were collected regarding the incidence of side effects (*e.g.*, nausea, vomiting, and pruritus). Hypotension was defined as a 30% decrease of systolic blood pressure or a systolic blood pressure of less than 100 mmHg, and ventilatory depression was defined as a respiratory rate of less than 10 breaths per minute. Level of sedation was assessed qualitatively by one of the investigators (ST). The patient was considered sedated if she was asleep or if she responded affirmatively to the question, "Do you feel sleepy?"

*Phase II.* On the first complaint of pain after delivery, patients were administered in a randomized, double-blind fashion either: epidural sufentanil, 50 µg (10 ml), and iv saline (2 ml) (EPI-50 group, n = 20); or iv sufentanil, 10 µg (2 ml), and epidural saline (10 ml) (IV-10 group, n = 20). Study medications were prepared by the pharmacy in identical syringes. The doses selected were based on preliminary studies with sufentanil in cesarean section patients<sup>5</sup> which had demonstrated a brief duration of analgesia when doses lower than 50 µg were administered epidurally, and adequate analgesia when bolus doses of 10 µg were administered intravenously. Moreover, since pronounced sedation and transient respiratory depression had resulted following injection of sufentanil, 30 µg iv, in some patients in Phase I of the study, we did not consider it safe in a double-blind study to administer a bolus dose which might result in loss of consciousness and increase the risk of pulmonary aspiration.

The degree of analgesia was assessed by asking the patient to make a mark on a 100-mm linear visual analog pain scale (VAS),<sup>5</sup> where one end represented no pain and the other end represented the most severe pain ever experienced by the patient. Evaluations of pain with the VAS were performed before administration of the study drug and at 15-min intervals after injection for at least 1 h. The efficacy of the initial analgesic treatment also was assessed by quantitating the amount of additional narcotic required in the first 24 h postoperatively. To circumvent the problem of nursing availability and subjective judgement, we allowed the patients to self-administer sufentanil using the Abbott Life Care® patient-controlled analgesic (PCA) device for the first 24 h. The PCA orders allowed sufentanil to be administered in 5–15 µg bolus doses, with a lockout period of 10–20 min. The total dose of sufentanil administered *via* the PCA in the first 24 h after the operation was recorded. The duration of analgesia with the

§ G. Vanden Bussche, M.D. (personal communication).

study drug was the time from its administration until the patient first used the PCA device. Sedation was evaluated at 15–30-min intervals for 2 h after study drug administration using a composite sedation analog score.<sup>5</sup> This sedation score was obtained by calculating the average of five 100-mm visual analog scales, the extremes of which represented: wide awake and almost asleep; energetic and tired; well coordinated and clumsy; clear headed and fuzzy; and alert and drowsy, respectively. In addition to noting the incidence of side effects, the severity of nausea, vomiting, and pruritus was graded from 0–3 (0 = absent; 1 = mild; 2 = moderate; and 3 = severe).

Data were analyzed using one-way analysis of variance (Phase I), unpaired Student's *t* test (Phase II), and Chi-square analysis with Fisher's exact test for the discrete variables. A *P* value of less than 0.05 was regarded as significant.

## RESULTS

**Phase I.** The groups did not differ statistically with respect to age, height, and weight (table 1). Serum sufentanil levels are illustrated in figure 1. Peak sufentanil levels occurred within 10 min following the 30- $\mu$ g iv dose and the 30- $\mu$ g epidural dose (fig. 1A). Serum sufentanil levels were lowest with the 30- $\mu$ g epidural dose and were barely detectable (less than 0.1 ng/ml) after 10 min. The addition of epinephrine to 50  $\mu$ g of epidural sufentanil significantly decreased the sufentanil level at 10 min, and may have contributed to an increased sufentanil level at 75 min after administration (fig. 1B).

Duration of analgesia in the groups in Phase I is shown in table 1. Epidural administration of sufentanil resulted in analgesia lasting  $200 \pm 37$  to  $258 \pm 16$  min (mean  $\pm$  SEM), whereas intravenous administration produced analgesia lasting only  $108 \pm 20$  min. With respect to duration of analgesia, the 30  $\mu$ g iv dose was

TABLE 1. Phase I: Patient Characteristics and Duration of Analgesia

|                                   | Intravenous<br>30 $\mu$ g<br>(n = 6) | Epidural<br>30 $\mu$ g<br>(n = 6) | Epidural<br>50 $\mu$ g<br>(n = 6) | Epidural<br>50 $\mu$ g<br>+ Epinephrine<br>(n = 5) |
|-----------------------------------|--------------------------------------|-----------------------------------|-----------------------------------|----------------------------------------------------|
| Age (yr)                          | 31 $\pm$ 3                           | 29 $\pm$ 3                        | 31 $\pm$ 2                        | 32 $\pm$ 1                                         |
| Height (cm)                       | 157 $\pm$ 3                          | 163 $\pm$ 3                       | 163 $\pm$ 3                       | 163 $\pm$ 3                                        |
| Weight (kg)                       | 72 $\pm$ 5                           | 79 $\pm$ 7                        | 91 $\pm$ 5                        | 72 $\pm$ 7                                         |
| Duration of<br>analgesia<br>(min) | 108 $\pm$ 20*                        | 200 $\pm$ 37                      | 220 $\pm$ 48                      | 258 $\pm$ 16                                       |

Values are mean  $\pm$  SEM.

\* *P* < 0.05 vs. epidural 50  $\mu$ g, and epidural 50  $\mu$ g + epinephrine.

significantly different from both 50- $\mu$ g epidural doses, but not from the 30- $\mu$ g epidural dose. Epinephrine did not significantly prolong the analgesia obtained with 50  $\mu$ g of epidural sufentanil.

The incidence of side effects is summarized in table 2. Hypotension did not occur in any patient. One patient who received sufentanil, 30  $\mu$ g, iv, transiently had a respiratory rate less than 8 breaths/min, but did not require treatment with a narcotic antagonist. The small numbers of patients in each treatment group precluded statistical analysis of these data.

**Phase II.** The two groups in Phase II were similar to each other with respect to age, weight, and height (table 3). The dose of local anesthetic used during surgery, the number of patients who were in labor at the time of their cesarean, and the number of patients undergoing repeat cesarean sections were also similar.

Analgesia following 50  $\mu$ g of epidural sufentanil was of similar intensity, i.e., similar decrease in visual analog pain score at 15 min, to that following 10  $\mu$ g of iv sufentanil (fig. 2). However, duration of analgesia was significantly longer with epidural than with iv sufentanil (table 3). The precise time of onset of analgesia was not established, since pain was not evaluated until 15 min

FIG. 1. Serum sufentanil concentrations (mean  $\pm$  SEM) as a function of time. A. Sufentanil, 30  $\mu$ g, iv ( $\blacktriangle$  —  $\blacktriangle$ ) and 30  $\mu$ g, epidurally ( $\diamond$  —  $\diamond$ ). B. Sufentanil, 50  $\mu$ g, epidurally ( $\circ$  —  $\circ$ ) and 50  $\mu$ g + epinephrine, epidurally ( $\bullet$  —  $\bullet$ ). \*Significant difference between treatment groups.

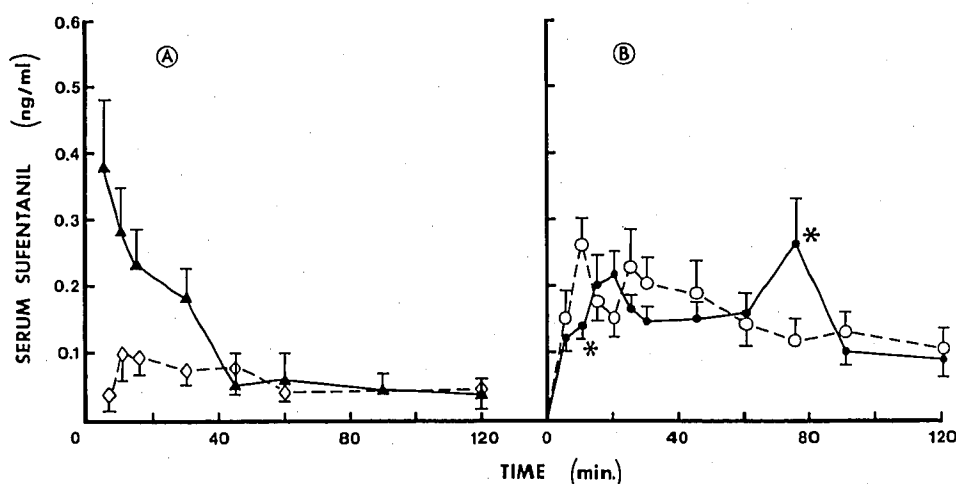

TABLE 2. Phase I: Numbers of Patients with Side Effects in Each Sufentanil Treatment Group

|                        | Intravenous<br>30 $\mu$ g<br>(n = 6) | Epidural<br>30 $\mu$ g<br>(n = 6) | Epidural<br>50 $\mu$ g<br>(n = 6) | Epidural<br>50 $\mu$ g + Epinephrine<br>(n = 5) |
|------------------------|--------------------------------------|-----------------------------------|-----------------------------------|-------------------------------------------------|
| Sedation               | 6                                    | 1                                 | 5                                 | 2                                               |
| Nausea                 | 2                                    | 2                                 | 3                                 | 1                                               |
| Vomiting               | 2                                    | 1                                 | 0                                 | 1                                               |
| Pruritus               | 2                                    | 1                                 | 2                                 | 3                                               |
| Respiration depression | 1                                    | 0                                 | 0                                 | 0                                               |

TABLE 3. Phase II: Patient Characteristics and Analgesic Properties

|                                | IV-10<br>(n = 20) | EPI-50<br>(n = 20) |
|--------------------------------|-------------------|--------------------|
| Age (yr)                       | 30 $\pm$ 1        | 30 $\pm$ 1         |
| Height (cm)                    | 163 $\pm$ 3       | 160 $\pm$ 3        |
| Weight (kg)                    | 80 $\pm$ 4        | 78 $\pm$ 5         |
| Duration of analgesia<br>(min) | 96 $\pm$ 15       | 232 $\pm$ 24*      |

Values are mean  $\pm$  SEM. IV-10 = intravenous sufentanil, 10  $\mu$ g; EPI-50 = epidural sufentanil, 50  $\mu$ g.

\*  $P < 0.0001$ .

after sufentanil injection, by which time all patients with the exception of three in the iv group had marked pain relief. Pain scores did not change significantly between 15 and 30 min. The requirement for supplemental (PCA) sufentanil in the first 12 h was only  $85 \pm 2 \mu$ g following epidural sufentanil (EPI-50 group), as compared with  $122 \pm 11 \mu$ g following iv sufentanil (IV-10 group) ( $P < 0.01$ ). However, when the initial sufentanil injection is included, the total dosage in the first 12 h was the same in both groups (EPI-50: 135  $\mu$ g, and IV-10: 132  $\mu$ g). In the period from 12–24 h after study drug administration, there was no difference in sufentanil usage between the groups (EPI-50:  $111 \pm 15 \mu$ g vs. IV-10:  $115 \pm 16 \mu$ g).

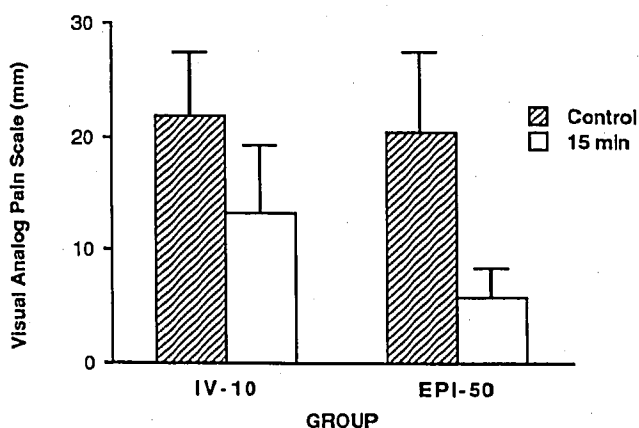

FIG. 2. Visual analog pain score before, and 15 min after, administration of sufentanil (IV-10 = intravenous sufentanil, 10  $\mu$ g; EPI-50 = epidural sufentanil, 50  $\mu$ g). Values are mean  $\pm$  SEM.

The groups also were similar with respect to the maximum increase in sedation score measured at 15–30 min (fig. 3). Neither respiratory depression nor hypotension was observed in any patient as a result of the initial treatment. The incidence of side effects reported in the first hour after study drug administration is summarized in table 4. Nausea and vomiting were always mild or moderate. Pruritus was mild, except for two patients in the epidural group who complained of severe itching.

## DISCUSSION

The high incidence of side effects with epidural morphine and other opioids with low lipid solubility led to the suggestion that the newer, more lipid-soluble agents might have a more rapid onset and be safer and more efficacious.<sup>1</sup> Satisfactory analgesia following cesarean section was obtained with epidural administration of fentanyl, 50–75  $\mu$ g, but its duration was considerably less (2–4 h)<sup>6</sup> than that of morphine (12–24 h).<sup>7,8</sup> Studies in experimental animals have indicated that epidurally administered sufentanil might be both more potent and longer acting than fentanyl.<sup>9,10</sup> However, because sufentanil is more lipid soluble than morphine, it may result in greater systemic absorption, which might produce side effects soon after injection.

Our data demonstrated rapid absorption of sufentanil following both epidural and intravenous administration. Given the high lipophilicity of sufentanil, it is not surprising that it is rapidly absorbed after epidural injection. However, it raises a question as to whether the primary analgesic effect of epidurally administered sufentanil is due to a systemic or a spinal action. Following iv sufentanil, analgesia persisted for about 60 min once serum levels had become undetectable ( $<0.1$  ng/ml), whereas it persisted for 80–140 min in the epidural groups with similarly undetectable levels. This suggests that the analgesic properties of epidural sufentanil are due, in part, to a spinal action of the opiate.

In studies involving rats, Colpaert *et al.*<sup>11</sup> similarly demonstrated significant plasma concentrations following both epidural and iv sufentanil. They reported essentially equipotent analgesic effects with both routes of administration, but found less pharmacologic activity originating from cerebral sites and less binding in most areas of brain tissue following epidural than following intravenous administration. Also, the relatively greater degree of binding to mu-receptors in the spinal cord at low epidural doses, as compared with similar intravenous doses, supports a spinal site of action. Nevertheless, it is likely that systemic absorption contributes to the analgesic effect of epidural sufentanil, particularly in the period immediately after administration. The ad-

dition of epinephrine may contribute to a delayed absorption of sufentanil; however, it does not produce a significant prolongation of its analgesic effects.

With respect to clinical efficacy, both epidural and iv sufentanil produced a rapid onset of analgesia. Although the maximal intensity of analgesia was similar with both routes of administration, the duration of pain relief was longer with epidural than with iv sufentanil. This difference in duration might be explained by the fact that larger doses were injected epidurally than intravenously. This is unlikely to be the sole explanation, however, since analgesia with iv sufentanil was not significantly more prolonged following the 30- $\mu$ g dose than following the 10- $\mu$ g dose ( $108 \pm 20$  min vs.  $96 \pm 15$  min). In fact, our study design would have tended to underestimate the difference in duration of effect between the two routes of administration for two reasons. Firstly, since all patients in Phase I and most in Phase II received sufentanil intraoperatively, the duration of analgesia recorded with iv sufentanil would have reflected in part the residual analgesia resulting from the epidural lidocaine. Secondly, chloroprocaine was used to supplement the epidural block in 35–45% of all patients. Since this agent has been reported to impair the efficacy of epidurally administered narcotics,<sup>12,13</sup> it might have resulted in a shorter duration of analgesia with epidural sufentanil.

Our findings are consistent with those reported in other clinical studies of epidural sufentanil, in which a minimum dose of 30  $\mu$ g has been found necessary to produce satisfactory analgesia following cesarean section, thoracotomy, and orthopedic surgery.<sup>14–17</sup> In some of these studies,<sup>14,15,17</sup> increasing the sufentanil dosage to 60–75  $\mu$ g produced little or no improvement in quality or duration of analgesia. This “ceiling effect” for analgesia has been reported with other epidurally administered narcotics,<sup>6</sup> and may relate to saturation of opiate receptors in the spinal cord. Although sufentanil and fentanyl have not been directly compared with one another in a clinical study, the analgesia resulting from 25–50  $\mu$ g of epidural sufentanil appears similar to that resulting from 50–100  $\mu$ g of epidural fentanyl. Thus, the potencies of sufentanil and fentanyl appear different when they are administered by the epidural route (relative potency about 1–2:1) than when they are administered by the intravenous route (relative potency 7–10:1).

Serious side effects did not occur in our patients with epidural sufentanil at any dosage. Drowsiness was a common side effect of sufentanil, and was most marked with the 30- $\mu$ g iv and the 50- $\mu$ g epidural doses. Sedation was minimal with the 30- $\mu$ g epidural dose, possibly related to the lower plasma concentrations in this group (fig. 1). Duckett *et al.*<sup>15</sup> and Donadoni *et al.*<sup>16</sup> found that

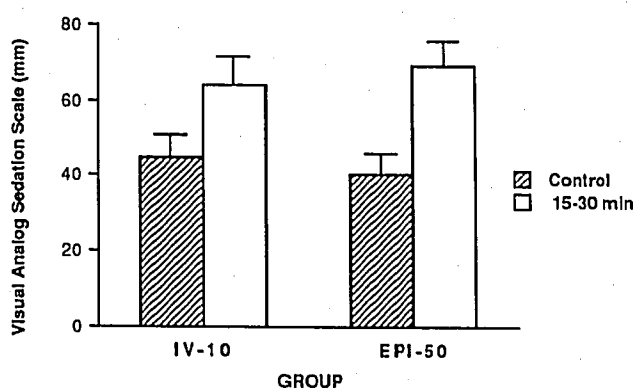

FIG. 3. Visual analog sedation score before, and 15–30 min after, administration of sufentanil (IV-10 = intravenous sufentanil, 10  $\mu$ g; EPI-50 = epidural sufentanil, 50  $\mu$ g). Values are mean  $\pm$  SEM.

drowsiness occurred in all patients who obtained satisfactory analgesia with epidural sufentanil.

Respiratory depression was not observed following epidural sufentanil in our study, or in other studies involving cesarean section or orthopedic surgery patients.<sup>14,16</sup> However, Whiting *et al.*<sup>17</sup> demonstrated severe respiratory depression in post-thoracotomy patients following 20-ml epidural injections containing 30, 50, or 75  $\mu$ g of sufentanil. In that study, dose-related ventilatory depression occurred 10–38 min following epidural administration. This could have been a consequence of systemic absorption of sufentanil, or of direct venous transit of the narcotic to the respiratory center via the epidural plexus of veins. Alternatively, sufentanil may have ascended rapidly in the CSF to the respiratory center. The use of a relatively large volume of diluent (20 ml) in the study of Whiting *et al.*<sup>17</sup> may have accelerated cephalad spread along the neuraxis. In addition, residual effects of general anesthesia, and ventilatory impairment secondary to the operation itself may have made their patients more susceptible to the respiratory depressant effects of sufentanil.

In summary, both intravenous and epidural sufentanil provided a rapid onset of analgesia, the duration of which was longer following epidural administration

TABLE 4. Phase II: Numbers of Patients with Side Effects in the First Hour Following Study Drug Administration

|                        | IV-10<br>(n = 20) | EPI-50<br>(n = 20) |
|------------------------|-------------------|--------------------|
| Nausea                 | 5                 | 5                  |
| Vomiting               | 1                 | 2                  |
| Pruritus               | 1                 | 8*                 |
| Respiratory depression | 0                 | 0                  |

IV-10 = intravenous sufentanil, 10  $\mu$ g; EPI-50 = epidural sufentanil, 50  $\mu$ g.

\*  $P < 0.05$ .

(3–4 h) than following intravenous administration (1–2 h). Increasing the dose of sufentanil by either route did not significantly prolong analgesia, and is not recommended because of the possibility of respiratory depression secondary to higher plasma concentrations. Although epidural sufentanil has a relatively short duration of effect, its rapid onset makes it an ideal agent for supplementing epidural local anesthetic analgesia (for example, during exteriorization of the uterus during cesarean section), or for initiating analgesia in patients experiencing acute postoperative pain prior to administration of a longer-acting narcotic. Our preliminary data would suggest that epidural sufentanil, 30  $\mu$ g, provides adequate postoperative analgesia with minimal narcotic-induced side effects.

The authors thank Professor Bradley Efron, Department of Statistics, Stanford University School of Medicine, for his advice and assistance.

#### REFERENCES

1. Cousins MJ, Mather LE: Intrathecal and epidural administration of opioids. *ANESTHESIOLOGY* 61:276–310, 1984
2. Bromage PR, Camporesi EM, Durant PAC, Nielsen CM: Rostral spread of epidural morphine. *ANESTHESIOLOGY* 56:431–436, 1982
3. Bromage PR: The price of intraspinal narcotic analgesia: Basic constraints (editorial). *Anesth Analg* 60:461–463, 1981
4. Michiels M, Hendriks R, Heykants J: Radioimmunoassay of the new opiate analgesics alfentanil and sufentanil. Pharmacokinetic profile in man. *J Pharm Pharmacol* 35:86–93, 1983
5. Bond A, Lader M: The use of analogue scales in rating subjective feelings. *J Med Psychol* 47:211–216, 1974
6. Naulty JS, Datta S, Ostheimer GW, Johnson MD, Burger GA: Epidural fentanyl for postcesarean delivery pain management. *ANESTHESIOLOGY* 63:694–698, 1985
7. Cohen SE, Woods WA: The role of epidural morphine in the post-cesarean patient: Efficacy and effects on bonding. *ANESTHESIOLOGY* 58:500–504, 1983
8. Rosen MA, Hughes SC, Shnider SM, Abboud TK, Norton M, Dailey PA, Curtis JD: Epidural morphine for the relief of postoperative pain after cesarean delivery. *Anesth Analg* 62:666–672, 1983
9. Yaksh TL, Noueihed RY, Durant PAC: Studies of the pharmacology and pathology of intrathecally administered 4-anilinopiperidine analogues and morphine in the rat and cat. *ANESTHESIOLOGY* 64:54–66, 1986
10. Aoki M, Senami M, Kitahata LM, Collins JC: Spinal sufentanil effects on spinal pain transmission neurons in cats. *ANESTHESIOLOGY* 64:225–229, 1986
11. Colpaert FC, Leysen JE, Michiels M, Van der Hoogen RHM: Epidural and intravenous sufentanil in the rat: Analgesia, opiate receptor binding, and drug concentrations in plasma and brain. *ANESTHESIOLOGY* 65:41–49, 1986
12. Kotenko DM, Thigpen JW, Shnider SM, Foutz SE, Rosen MA, Hughes SC: Postoperative epidural morphine analgesia after various local anesthetics. *ANESTHESIOLOGY* 59:A413, 1983
13. Naulty JS, Hertwig L, Hunt CO, Hartwell B, Datta S, Ostheimer GW, Covino BG: Duration of analgesia of epidural fentanyl following cesarean delivery—Effect of local anesthetic drug selection. *ANESTHESIOLOGY* 65:A180, 1986
14. Leicht CH, Rosen MA, Dailey PA, Hughes SC, Shnider SM, Baker BW, Cheek DB, O'Connor DE: Evaluation and comparison of epidural sufentanil citrate and morphine sulfate for analgesia after cesarean section. *ANESTHESIOLOGY* 65:A365, 1986
15. Duckett JE, McDonnell T, Zebrowski M, Witte M: A comparison of thoracic vs. lumbar epidural injections of sufentanil for postoperative analgesia after upper abdominal surgery. *ANESTHESIOLOGY* 65:A179, 1986
16. Donadoni R, Rolly G, Noorduyn H, Vanden Bussche G: Epidural sufentanil for postoperative pain relief. *Anaesthesia* 40:634–638, 1985
17. Whiting WG, Sandler AN, Lau LC, Chovaz PM: Analgesic and respiratory effects of epidural sufentanil in post-thoracotomy patients. *ANESTHESIOLOGY* 65:A176, 1986

Anesthesiology  
68:134–137, 1988

### Repeated Anesthesia for a Patient With Neuroleptic Malignant Syndrome

JEREMY GEIDUSCHEK, M.D.,\* SETH A. COHEN, M.D.,† ARIFULLA KHAN, M.D.,‡ BRUCE F. CULLEN, M.D.§

\* Resident, Department of Anesthesiology.

† Acting Assistant Professor, Department of Psychiatry and Behavioral Sciences.

‡ Assistant Professor, Department of Psychiatry and Behavioral Sciences.

§ Professor, Department of Anesthesiology.

Received from the Departments of Anesthesiology and Psychiatry and Behavioral Sciences, Harborview Medical Center, University of Washington School of Medicine, Seattle, Washington. Accepted for publication August 4, 1987.

Address reprint requests to Dr. Cullen: Department of Anesthesiology, Harborview Medical Center, Seattle, Washington 98104.

Key words: Anesthesia; electroconvulsive therapy. Hyperthermia; malignant. Neuroleptic malignant syndrome.

Since Delay and Deniker first described the neuroleptic malignant syndrome (NMS) in the English language as a potential complication of using neuroleptics,<sup>1</sup> approximately 300 cases have been reported.<sup>2,3</sup> Signs of NMS, which appear over a 24–72-h period, include muscular rigidity, hyperthermia, altered level of consciousness, and autonomic instability (manifested as tachycardia, labile blood pressure, diaphoresis, and incontinence). The syndrome occurs hours to months after known exposure to neuroleptics, such as haloperidol, fluphenazine, and thiothixene. It has been said that NMS is underdiagnosed and that the frequency is as
